# Supplementary material
Source: Research Square preprint supplement (doi:10.21203/rs.3.rs-9086905/v1)
Supplement: Supplementary file 1 [file 0293f2483da703d0051283cc.docx]

| **Table-2** | | | | | | | | | | | |
| --- | --- | --- | --- | --- | --- | --- | --- | --- | --- | --- | --- |
|  | Preop | | | |  | Postop | | | |  | |
|  | Mean±sd | | | Median |  | Mean±sd | | | Median |
| Area (x10³) | 34.9 | ± | 20.6 | 30.9 |  | 16.8 | ± | 21.0 | 10.1 | ***0.000*** | W |
| w Wilcoxon test | | | | | | | | | | | |
