# Supplementary material
Source: Research Square preprint supplement (doi:10.21203/rs.3.rs-9086905/v1)
Supplement: Supplementary file 2 [file ba2fae90de2042eda297feda.docx]

| **Table-1.** Demographic, clinical, and laboratory characteristics of patients with xanthelasma palpebrarum | | | | | | | | |
| --- | --- | --- | --- | --- | --- | --- | --- | --- |
|  |  | Min-Max | | | Median | Mean±sd/n-% | | |
| Age | | 34.0 | - | 75.0 | 51.0 | 50.5 | ± | 8.8 |
| Gender | Female |  |  |  |  | 31 |  | 75.6% |
| Male |  |  |  |  | 10 |  | 24.4% |
| Side | Right |  |  |  |  | 19 |  | 46.3% |
| Left |  |  |  |  | 22 |  | 53.7% |
| Localization | İnferior |  |  |  |  | 20 |  | 48.8% |
| Superior |  |  |  |  | 21 |  | 51.2% |
| Area (x10³) | | 6.8 | - | 84.5 | 30.9 | 34.9 | ± | 20.6 |
|  | |  |  |  |  |  |  |  |
| LDL | | 81.0 | - | 182.0 | 129.0 | 134.1 | ± | 30.8 |
| Total Cholesterol | | 141.0 | - | 279.0 | 212.0 | 216.5 | ± | 35.6 |
| TG | | 60.0 | - | 362.0 | 147.5 | 164.5 | ± | 81.5 |
| HDL | | 30.0 | - | 76.0 | 45.0 | 47.8 | ± | 11.7 |

Abbreviations:

LDL, low-density lipoprotein; HDL, high-density lipoprotein; TG, triglycerides; sd, standard deviation.
