# Supplementary material
Source: Research Square preprint supplement (doi:10.21203/rs.3.rs-9086905/v1)
Supplement: Supplementary file 3 [file ffc46bbb701fb319048a542c.docx]

| Table 3. Comparison of demographic characteristics, lesion area measurements,  and lipid profile parameters between inferior and superior xanthelasma groups | | | | | | | | | | | | |
| --- | --- | --- | --- | --- | --- | --- | --- | --- | --- | --- | --- | --- |
|  |  | İnferior Group (n:20) | | | |  | Superior Group (n:21) | | | | p | |
|  | Mean±sd/n-% | | | Median |  | Mean±sd/n-% | | | Median |
| Age | | 51.4 | ± | 11.3 | 51.0 |  | 49.6 | ± | 5.7 | 49.0 | 0.628 | m |
| Gender | Female | 14 |  | 70.0% |  |  | 17 |  | 81.0% |  | 0.414 | X² |
| Male | 6 |  | 30.0% |  |  | 4 |  | 19.0% |  |
| Side | Right | 8 |  | 40.0% |  |  | 11 |  | 52.4% |  | 0.427 | X² |
| Left | 12 |  | 60.0% |  |  | 10 |  | 47.6% |  |
| **Area (x10³)** | |  |  |  |  |  |  |  |  |  |  |  |
| Preop | | 46.2 | ± | 20.9 | 45.8 |  | 24.2 | ± | 13.8 | 20.1 | ***0.000*** | m |
| Postop | | 19.2 | ± | 15.8 | 20.0 |  | 14.5 | ± | 25.2 | 6.9 | ***0.000*** | m |
| Preop/ Postop Differance | | 27.0 | ± | 18.8 | 23.9 |  | 9.7 | ± | 25.0 | 7.7 | ***0.000*** | m |
| *Intragroup P Value* | | ***0.000*** | | | W |  | ***0.001*** | | | W |  |  |
| LDL | | 130.8 | ± | 26.7 | 128.5 |  | 137.5 | ± | 34.9 | 148.0 | 0.424 | m |
| Total Cholesterol | | 211.5 | ± | 36.3 | 208.0 |  | 221.5 | ± | 35.0 | 227.5 | 0.381 | t |
| TG | | 131.8 | ± | 47.2 | 124.5 |  | 197.2 | ± | 95.7 | 187.0 | ***0.041*** | m |
| HDL | | 50.9 | ± | 10.9 | 47.0 |  | 44.7 | ± | 11.9 | 43.5 | ***0.017*** | m |
| Abbreviations:  t Independent Samples t test / m Mann-whitney u test / w Wilcoxon test/ X² Chi-square test  LDL, low-density lipoprotein; HDL, high-density lipoprotein; TG, triglycerides; sd, standard deviation. | | | | | | | | | | | | |
